# Supplementary material for: Modelling high performance potassium-ion battery anode materials with two-dimensional vanadium carbide MXene: the role of surface O- and S-terminations
Source: Royal Society of Chemistry journal article supplement (doi:10.1039/d0cp04969g), 2021-01-01
Supplement: d0cp04969g1.pdf [file d0cp04969g1.pdf]

Electronic Supplementary Information (ESI) for:

## **Modelling high performance potassium-ion batteries anode materials with two-dimensional vanadium carbide MXene: The role of surface O- and S-terminations**

Shifeng Wang,<sup>1,2,3,\*,#</sup> Yatong Wang,<sup>4,#</sup> Qianyu Zhou,<sup>1</sup> Xin Li,<sup>1</sup> Yong Li,<sup>1,2</sup> Yanfang Liu,<sup>1</sup> Yaxun Sun,<sup>1</sup> Tingting Wang,<sup>1</sup> Li-Chun Xu,<sup>4,\*</sup> Yuanhao Wang<sup>5,\*</sup>

1 Department of Physics, Innovation Center of Materials for Energy and Environment Technologies (i-MEET), College of Science, Tibet University, Lhasa 850000, China;

2 Institute of Oxygen Supply, Center of Tibetan Studies (Everest Research Institute), Tibet University, Lhasa 850000, China;

3 Key Laboratory of Cosmic Rays (Tibet University), Ministry of Education, Lhasa 850000, China;

4 College of Physics and optoelectronics, Taiyuan University of Technology, Taiyuan 030024, China;

5 SUSTech Engineering Innovation Center, School of Environmental Science and Engineering, Southern University of Science and Technology.

\* Correspondence: [wsf@utibet.edu.cn](mailto:wsf@utibet.edu.cn); [xulichun@tyut.edu.cn](mailto:xulichun@tyut.edu.cn); [wangyh2020@mail.sustech.edu.cn](mailto:wangyh2020@mail.sustech.edu.cn);

# These authors contributed equally to this work.

Funding: Wuhan University of Technology-Tibet University Joint Innovation Fund (LZJ2020003); The Reform and Development Funds for Local Region Universities from China Government in 2020 (ZCKJ 2020-11); National Natural Science Foundation of China (61705258).

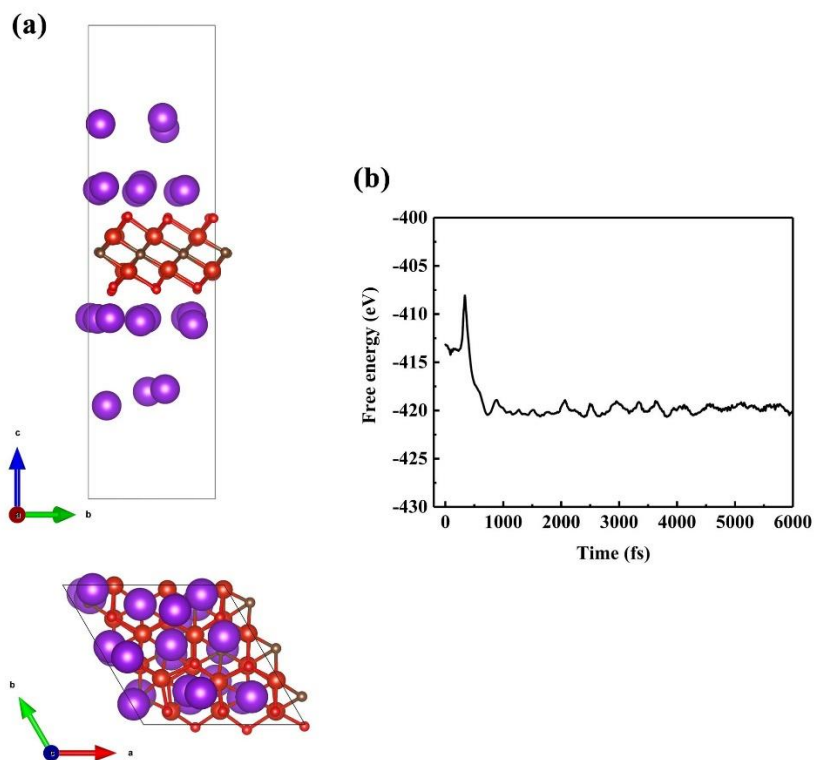

Figure S1. (a) Top and side view of snapshot after equilibration and (b) free energy as a function of MD time at the temperature of 300 K for  $V_2CO_2K_{2.67}$ .

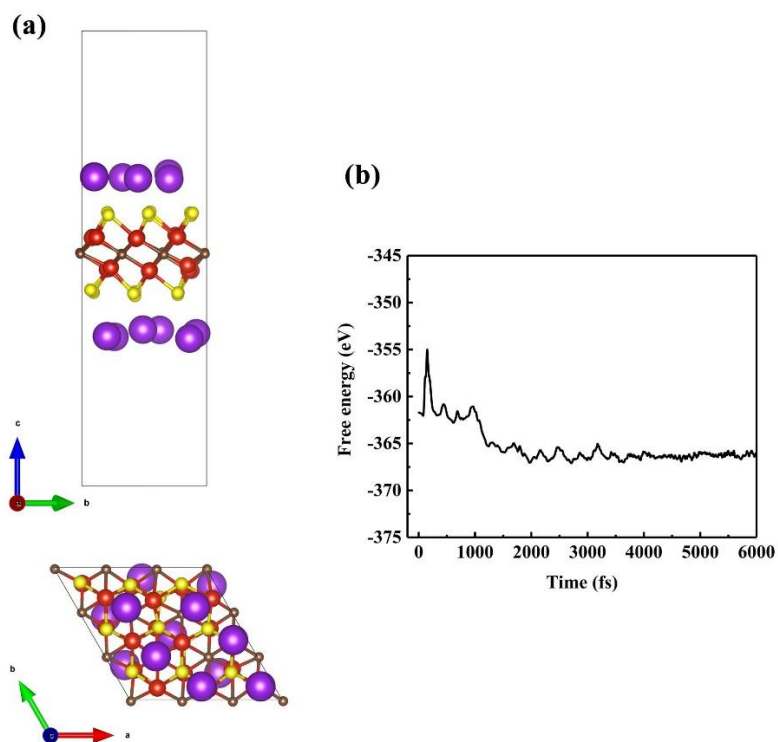

Figure S2. (a) Top and side view of snapshot after equilibration and (b) free energy as a function of MD time at the temperature of 300 K for  $V_2CS_2K_{1.33}$ .
